# Supplementary material
Source: PubMed Central journal article supplement (PMC7212399)
Supplement: selvin_web_material_final_kwz177.pdf [file selvin_web_material_final_kwz177.pdf]

**Hypertension Awareness, Treatment, and Control in US Adults: Trends in the  
Hypertension Control Cascade by Population Subgroup (National Health and Nutrition  
Examination Survey, 1999–2016)**

Kathryn Foti, Dan Wang, Lawrence J. Appel, and Elizabeth Selvin

Table of Contents:

**Web Table 1.** Hypertension Prevalence, Awareness, Treatment, Control and Control Among Those Treated—US adults aged  $\geq 25$ , National Health and Nutrition Examination Survey, 1999–2016.

**Web Table 2.** Hypertension Prevalence, Awareness, Treatment, Control, and Control Among Those Treated by Age Group in 2-Year Survey Cycles—US Adults Aged  $\geq 25$ , National Health and Nutrition Examination Survey, 1999–2016.

**Web Table 3.** Hypertension Prevalence, Awareness, Treatment, Control and Control Among Those Treated by Age Group and Sex—US adults aged  $\geq 25$ , National Health and Nutrition Examination Survey, 1999–2016.

**Web Table 4.** Hypertension Prevalence, Awareness, Treatment, Control and Control Among Those Treated by Age Group and Race/Ethnicity—US Adults Aged  $\geq 25$ , National Health and Nutrition Examination Survey, 1999–2016.

**Web Table 5.** Trends in hypertension control by age group before and after adjustment for demographic and clinical characteristics—US adults aged  $\geq 25$ , National Health and Nutrition Examination Survey, 1999–2016.

**Web Table 6.** Trends in hypertension control by age group before and after adjustment for demographic and clinical characteristics among those aware of their hypertension—US adults aged  $\geq 25$ , National Health and Nutrition Examination Survey, 2007–2016.

**Web Table 7.** Hypertension Treatment Goals from Major National Guidelines During 1999–2016.

**Web Table 1.** Hypertension Prevalence, Awareness, Treatment, Control and Control Among Those Treated—US adults aged  $\geq 25$ , National Health and Nutrition Examination Survey, 1999–2016

|                                                    | 1999–2004  | 2005–2010   | 2011–2016     |
|----------------------------------------------------|------------|-------------|---------------|
| Hypertension prevalence, % (SE)                    |            |             |               |
| 25–44                                              | 11.8 (0.7) | 12.0 (0.6)  | 12.8 (0.7)    |
| 45–64                                              | 39.5 (1.3) | 39.7 (1.1)  | 40.7 (0.9)    |
| $\geq 65$                                          | 70.6 (1.0) | 70.2 (1.1)  | 67.6 (1.3)    |
| Hypertension awareness, % (SE)                     |            |             |               |
| 25–44                                              | 62.5 (3.1) | 66.7 (2.6)  | 74.3 (2.0)*,† |
| 45–64                                              | 74.1 (1.6) | 81.8 (1.0)* | 83.2 (1.1)*   |
| $\geq 65$                                          | 74.0 (1.1) | 83.7 (1.0)* | 86.7 (0.9)*,† |
| Hypertension treatment, % (SE)                     |            |             |               |
| 25–44                                              | 46.1 (3.4) | 51.2 (2.7)  | 56.6 (2.3)*   |
| 45–64                                              | 62.8 (1.7) | 73.1 (1.2)* | 74.6 (1.5)*   |
| $\geq 65$                                          | 67.1 (1.6) | 79.9 (0.9)* | 82.1 (1.1)*   |
| Hypertension control, % (SE)                       |            |             |               |
| 25–44                                              | 33.5 (3.0) | 38.6 (2.6)  | 44.6 (2.3)*   |
| 45–64                                              | 39.3 (1.7) | 51.7 (1.4)* | 55.7 (1.9)*   |
| $\geq 65$                                          | 31.7 (1.3) | 49.3 (1.1)* | 49.9 (1.6)*   |
| Hypertension control <u>among treated</u> , % (SE) |            |             |               |
| 25–44                                              | 72.7 (3.2) | 75.3 (2.4)  | 78.8 (2.2)    |
| 45–64                                              | 62.6 (1.5) | 70.7 (1.4)* | 74.6 (1.5)*   |
| $\geq 65$                                          | 47.2 (1.5) | 61.7 (1.1)* | 60.8 (1.6)*   |

\* Statistically significant difference ( $P < 0.05$ ) as compared with 1999–2004.

† Statistically significant difference ( $P < 0.05$ ) as compared with 2005–2010.

**Web Table 2.** Hypertension Prevalence, Awareness, Treatment, Control, and Control Among Those Treated by Age Group in 2-Year Survey Cycles—US Adults Aged ≥25, National Health and Nutrition Examination Survey, 1999–2016

|                                            | 1999–2000  | 2001–2002  | 2003–2004  | 2005–2006  | 2007–2008  | 2009–2010  | 2011–2012  | 2013–2014  | 2015–2016  | Difference (SE)<br>2015–2016 Minus<br>2013–2014 | Difference (SE)<br>2015–2016 Minus<br>1999–2000 |
|--------------------------------------------|------------|------------|------------|------------|------------|------------|------------|------------|------------|-------------------------------------------------|-------------------------------------------------|
| Hypertension prevalence, % (SE)            |            |            |            |            |            |            |            |            |            |                                                 |                                                 |
| 25–44                                      | 12.3 (1.8) | 10.4 (0.8) | 12.5 (0.9) | 12.0 (1.4) | 13.3 (0.9) | 10.7 (0.7) | 12.6 (1.4) | 13.0 (1.0) | 12.8 (1.4) | -0.2 (1.7)                                      | 0.4 (2.3)                                       |
| 45–64                                      | 37.9 (2.2) | 37.7 (2.4) | 42.8 (2.3) | 39.8 (2.1) | 39.8 (1.3) | 39.5 (2.2) | 40.5 (1.5) | 41.2 (1.5) | 40.5 (1.8) | -0.7 (2.3)                                      | 2.6 (2.9)                                       |
| ≥65                                        | 70.3 (2.0) | 70.7 (1.4) | 70.0 (2.1) | 68.8 (1.1) | 70.3 (2.4) | 71.2 (1.8) | 67.5 (1.9) | 69.5 (1.5) | 66.0 (2.6) | -3.5 (3.0)                                      | -4.3 (3.3)                                      |
| Hypertension awareness, % (SE)             |            |            |            |            |            |            |            |            |            |                                                 |                                                 |
| 25–44                                      | 61.4 (7.0) | 57.8 (4.1) | 66.8 (4.6) | 60.3 (3.9) | 72.8 (4.9) | 66.1 (4.3) | 70.8 (4.5) | 78.2 (2.0) | 73.6 (3.3) | -4.6 (3.9)                                      | 12.2 (7.7)                                      |
| 45–64                                      | 75.0 (3.3) | 72.2 (2.3) | 75.1 (2.9) | 81.0 (2.0) | 80.4 (1.3) | 84.0 (1.7) | 82.9 (2.4) | 84.3 (1.6) | 82.2 (1.7) | -2.1 (2.3)                                      | 7.2 (3.7)                                       |
| ≥65                                        | 67.9 (1.8) | 74.2 (1.5) | 79.7 (1.9) | 82.4 (1.7) | 83.1 (1.2) | 85.4 (2.0) | 87.5 (1.6) | 88.2 (1.6) | 84.7 (1.7) | -3.4 (2.3)                                      | 16.8 (2.4)*                                     |
| Hypertension treatment, % (SE)             |            |            |            |            |            |            |            |            |            |                                                 |                                                 |
| 25–44                                      | 43.4 (6.5) | 41.6 (3.7) | 52.1 (6.4) | 40.5 (3.6) | 57.0 (4.5) | 56.5 (4.5) | 54.1 (4.4) | 57.3 (3.7) | 58.1 (4.0) | 0.8 (5.5)                                       | 14.7 (7.7)                                      |
| 45–64                                      | 66.1 (3.1) | 61.3 (2.1) | 61.9 (3.5) | 70.2 (2.0) | 71.1 (1.9) | 77.8 (2.3) | 75.4 (3.0) | 75.8 (2.4) | 72.6 (2.2) | -3.2 (3.2)                                      | 6.2 (3.8)                                       |
| ≥65                                        | 60.1 (3.1) | 67.0 (2.4) | 74.3 (2.1) | 77.7 (1.6) | 79.7 (1.2) | 82.1 (1.8) | 84.1 (1.9) | 82.6 (2.2) | 80.0 (1.8) | -2.6 (2.8)                                      | 19.9 (3.5)*                                     |
| Hypertension control, % (SE)               |            |            |            |            |            |            |            |            |            |                                                 |                                                 |
| 25–44                                      | 28.7 (5.1) | 28.2 (2.9) | 42.4 (6.3) | 30.9 (3.8) | 47.4 (4.3) | 36.2 (4.4) | 45.8 (5.5) | 46.7 (3.3) | 41.3 (3.1) | -5.3 (4.5)                                      | 12.6 (6.0)*                                     |
| 45–64                                      | 39.9 (2.9) | 38.9 (2.4) | 39.4 (3.2) | 48.2 (2.3) | 49.7 (2.5) | 57.1 (2.3) | 56.3 (3.3) | 57.0 (3.6) | 53.8 (2.8) | -3.2 (4.6)                                      | 13.7 (4.1)*                                     |
| ≥65                                        | 24.3 (2.4) | 32.2 (1.7) | 38.8 (2.1) | 44.0 (1.8) | 48.1 (1.9) | 55.1 (2.2) | 50.1 (2.6) | 54.1 (2.5) | 45.9 (3.1) | -8.2 (4.0)*                                     | 21.6 (4.0)*                                     |
| Hypertension control among treated, % (SE) |            |            |            |            |            |            |            |            |            |                                                 |                                                 |
| 25–44                                      | 66.2 (6.0) | 67.7 (5.9) | 81.3 (4.5) | 76.4 (5.3) | 83.1 (2.6) | 65.0 (4.9) | 84.7 (4.3) | 81.4 (2.4) | 71.1 (4.1) | -10.3 (4.8)*                                    | 5.0 (7.3)                                       |
| 45–64                                      | 60.3 (2.6) | 63.4 (2.4) | 63.6 (2.8) | 68.9 (2.9) | 69.8 (2.2) | 73.4 (2.0) | 74.6 (2.0) | 75.2 (2.8) | 74.1 (3.0) | -1.1 (4.1)                                      | 13.8 (4.0)*                                     |
| ≥65                                        | 40.4 (2.8) | 48.0 (1.9) | 52.2 (2.8) | 56.6 (2.0) | 60.3 (1.9) | 67.2 (1.7) | 59.6 (2.4) | 65.5 (2.2) | 57.3 (3.3) | -8.1 (4.0)*                                     | 17.0 (4.4)*                                     |

\* Statistically significant difference ( $P < 0.05$ ) as compared with reference survey cycle.

**Web Table 3.** Hypertension Prevalence, Awareness, Treatment, Control and Control Among Those Treated by Age Group and Sex—US adults aged ≥25, National Health and Nutrition Examination Survey, 1999–2016

| Outcome, Age Group (years), and Sex |       | Estimate, % (SE) |             |              | Difference (Women vs. Men), % (SE) |             |                |
|-------------------------------------|-------|------------------|-------------|--------------|------------------------------------|-------------|----------------|
|                                     |       | 1999–2004        | 2005–2010   | 2011–2016    | 1999–2004                          | 2005–2010   | 2011–2016      |
| <b>Prevalence</b>                   |       |                  |             |              |                                    |             |                |
| 25–44                               | Men   | 14.3 (1.1)       | 14.9 (0.8)  | 14.1 (1.1)   |                                    |             |                |
|                                     | Women | 9.1 (0.7)        | 8.9 (0.6)   | 11.4 (0.8)*† | -5.2 (1.3)‡                        | -6.1 (0.8)‡ | -2.7 (1.2)‡,   |
| 45–64                               | Men   | 38.5 (1.8)       | 39.5 (1.3)  | 43.3 (1.4)*† |                                    |             |                |
|                                     | Women | 40.5 (1.5)       | 39.9 (1.5)  | 38.2 (1.2)   | 2.0 (1.9)                          | 0.5 (1.8)   | -5.1 (1.8)‡,§, |
| ≥65                                 | Men   | 62.7 (1.7)       | 65.6 (1.7)  | 63.7 (1.7)*  |                                    |             |                |
|                                     | Women | 76.5 (1.1)       | 73.7 (1.3)  | 70.6 (1.4)   | 13.8 (2.0)                         | 8.1 (2.1)‡, | 7.0 (1.8)‡,§   |
| <b>Awareness</b>                    |       |                  |             |              |                                    |             |                |
| 25–44                               | Men   | 57.8 (3.3)       | 58.0 (3.2)  | 66.4 (2.9)   |                                    |             |                |
|                                     | Women | 70.8 (4.1)       | 81.9 (3.5)* | 84.5 (2.0)*  | 13.0 (4.4)‡                        | 23.9 (4.3)‡ | 18.1 (3.2)‡    |
| 45–64                               | Men   | 72.6 (2.1)       | 78.8 (1.4)* | 81.0 (1.5)*  |                                    |             |                |
|                                     | Women | 75.4 (2.6)       | 84.7 (1.3)* | 85.5 (1.7)*  | 2.8 (3.6)                          | 5.8 (1.9)‡  | 4.5 (2.3)      |
| ≥65                                 | Men   | 74.6 (1.5)       | 84.0 (1.3)* | 85.8 (1.4)*  |                                    |             |                |
|                                     | Women | 73.6 (1.5)       | 83.5 (1.3)* | 87.4 (1.1)*† | -1.0 (2.2)                         | -0.6 (1.7)  | 1.5 (1.6)      |
| <b>Treatment</b>                    |       |                  |             |              |                                    |             |                |
| 25–44                               | Men   | 40.0 (3.9)       | 41.5 (3.3)  | 45.3 (3.3)   |                                    |             |                |
|                                     | Women | 57.0 (4.3)       | 68.3 (4.0)  | 71.2 (2.8)*  | 17.0 (5.3)‡                        | 26.8 (4.9)‡ | 25.8 (4.0)‡    |
| 45–64                               | Men   | 61.0 (1.9)       | 69.1 (1.5)* | 70.1 (1.9)*  |                                    |             |                |
|                                     | Women | 64.4 (2.6)       | 76.9 (1.6)* | 79.4 (1.9)*  | 3.5 (2.9)                          | 7.8 (1.9)‡  | 9.3 (2.5)‡     |
| ≥65                                 | Men   | 68.3 (1.8)       | 80.0 (1.3)* | 80.9 (1.3)*  |                                    |             |                |
|                                     | Women | 66.4 (2.1)       | 79.9 (1.2)* | 83.0 (1.4)*  | -1.9 (2.4)                         | -0.1 (1.8)  | 2.0 (1.7)      |
| <b>Control</b>                      |       |                  |             |              |                                    |             |                |
| 25–44                               | Men   | 27.7 (3.7)       | 29.4 (2.9)  | 32.0 (2.7)   |                                    |             |                |
|                                     | Women | 43.8 (4.4)       | 54.8 (4.5)  | 61.0 (2.9)*  | 16.2 (5.8)‡                        | 25.4 (5.2)‡ | 29.0 (2.9)‡    |
| 45–64                               | Men   | 39.7 (2.4)       | 48.2 (2.0)* | 50.2 (2.5)*  |                                    |             |                |
|                                     | Women | 39.0 (2.1)       | 55.1 (1.8)* | 61.5 (2.1)*† | -0.7 (3.0)                         | 6.8 (2.5)‡  | 11.3 (2.7)‡,§  |
| ≥65                                 | Men   | 38.7 (1.9)       | 53.4 (1.6)* | 55.1 (2.0)*  |                                    |             |                |
|                                     | Women | 27.3 (1.5)       | 46.5 (1.2)* | 46.2 (2.0)*  | -11.3 (2.2)‡                       | -7.0 (1.7)‡ | -8.9 (2.4)‡    |

| Control among treated |       |            |             |               |              |               |              |
|-----------------------|-------|------------|-------------|---------------|--------------|---------------|--------------|
| 25–44                 | Men   | 69.2 (5.3) | 70.8 (3.5)  | 70.5 (3.9)    |              |               |              |
|                       | Women | 77.0 (4.1) | 80.1 (3.4)  | 85.7 (2.3)    | 7.7 (7.3)    | 9.3 (5.1)     | 15.2 (4.5)   |
| 45–64                 | Men   | 65.1 (3.0) | 69.8 (2.2)  | 71.7 (2.2)*   |              |               |              |
|                       | Women | 60.5 (1.8) | 71.6 (1.6)  | 77.5 (2.0)*,† | -4.6 (3.8)   | 1.8 (2.7)     | 5.8 (2.9)‡,§ |
| ≥65                   | Men   | 56.6 (2.1) | 66.8 (1.5)* | 68.1 (1.9)*   |              |               |              |
|                       | Women | 41.2 (1.8) | 58.1 (1.3)* | 55.7 (2.0)*   | -15.4 (2.7)‡ | -8.7 (1.8)‡,§ | -12.4 (2.4)‡ |

\* Statistically significant difference ( $P < 0.05$ ) as compared with 1999–2004 within category of age and sex.

† Statistically significant difference ( $P < 0.05$ ) as compared with 2005–2010 within category of age and sex.

‡ Statistically significant difference ( $P < 0.05$ ) within survey cycle for women versus men.

§ Statistically significant change in difference ( $P < 0.05$ ) as compared with 1999–2004 (i.e., interaction).

|| Statistically significant change in difference ( $P < 0.05$ ) as compared with 2005–2010 (i.e., interaction).

**Web Table 4.** Hypertension Prevalence, Awareness, Treatment, Control and Control Among Those Treated by Age Group and Race/Ethnicity—US Adults Aged ≥25, National Health and Nutrition Examination Survey, 1999–2016

| Outcome, Age Group (years), and Race/Ethnicity |          | Estimate, % (SE) |                         |                           | Difference (Reference White), % (SE) |                          |                           |
|------------------------------------------------|----------|------------------|-------------------------|---------------------------|--------------------------------------|--------------------------|---------------------------|
|                                                |          | 1999–2004        | 2005–2010               | 2011–2016                 | 1999–2004                            | 2005–2010                | 2011–2016                 |
| Prevalence                                     |          |                  |                         |                           |                                      |                          |                           |
| 25–44                                          | White    | 10.7 (0.8)       | 11.8 (0.8)              | 12.2 (1.1)                |                                      |                          |                           |
|                                                | Black    | 20.3 (1.5)       | 20.0 (1.3)              | 22.3 (1.3)                | 9.6 (1.7) <sup>‡</sup>               | 8.2 (1.7) <sup>‡</sup>   | 10.0 (1.4) <sup>‡</sup>   |
|                                                | Hispanic | 9.4 (1.0)        | 7.9 (0.9)               | 12.0 (1.1) <sup>†</sup>   | -1.3 (1.2)                           | -3.8 (1.2) <sup>‡</sup>  | -0.2 (1.4)                |
| 45–64                                          | White    | 37.6 (1.6)       | 37.5 (1.3)              | 38.7 (1.3)                |                                      |                          |                           |
|                                                | Black    | 57.2 (1.9)       | 58.9 (2.1)              | 60.0 (1.6)                | 19.6 (2.5) <sup>‡</sup>              | 21.4 (2.4) <sup>‡</sup>  | 21.3 (2.1) <sup>‡</sup>   |
|                                                | Hispanic | 35.2 (2.0)       | 35.3 (2.0)              | 35.0 (2.6)                | -2.4 (2.7)                           | -2.2 (2.3)               | -3.7 (2.8)                |
| ≥65                                            | White    | 69.4 (1.2)       | 69.0 (1.3)              | 65.7 (1.5)                |                                      |                          |                           |
|                                                | Black    | 81.9 (2.2)       | 83.5 (1.4)              | 80.7 (1.5)                | 12.5 (2.4) <sup>‡</sup>              | 14.5 (1.8) <sup>‡</sup>  | 15.0 (1.9) <sup>‡</sup>   |
|                                                | Hispanic | 69.1 (2.1)       | 67.7 (2.5)              | 68.5 (2.8)                | -0.3 (2.5)                           | -1.3 (2.7)               | 2.8 (2.8)                 |
| Awareness                                      |          |                  |                         |                           |                                      |                          |                           |
| 25–44                                          | White    | 66.5 (4.1)       | 67.6 (3.4)              | 75.4 (3.6)                |                                      |                          |                           |
|                                                | Black    | 62.4 (4.3)       | 71.2 (3.7)              | 79.2 (2.5) <sup>*</sup>   | -4.1 (5.9)                           | 3.6 (4.4)                | 3.8 (4.9)                 |
|                                                | Hispanic | 44.4 (5.9)       | 46.4 (6.0)              | 65.6 (4.4) <sup>*,†</sup> | -22.1 (7.6) <sup>‡</sup>             | -21.2 (6.3) <sup>‡</sup> | -9.8 (6.3)                |
| 45–64                                          | White    | 72.9 (2.0)       | 82.0 (1.3) <sup>*</sup> | 83.6 (1.6) <sup>*</sup>   |                                      |                          |                           |
|                                                | Black    | 81.4 (1.6)       | 84.9 (1.5)              | 85.5 (1.5)                | 8.5 (2.3) <sup>‡</sup>               | 2.9 (1.9)                | 1.9 (2.2) <sup>§</sup>    |
|                                                | Hispanic | 70.7 (3.8)       | 75.6 (2.0)              | 78.6 (2.8)                | -2.2 (4.3)                           | -6.4 (2.3) <sup>‡</sup>  | -5.0 (3.3)                |
| ≥65                                            | White    | 73.5 (1.2)       | 83.1 (1.1) <sup>*</sup> | 87.2 (1.2) <sup>*,†</sup> |                                      |                          |                           |
|                                                | Black    | 80.6 (1.9)       | 90.4 (1.7) <sup>*</sup> | 89.1 (1.0) <sup>*</sup>   | 7.2 (2.0) <sup>‡</sup>               | 7.4 (2.1) <sup>‡</sup>   | 1.9 (1.5) <sup>§,  </sup> |
|                                                | Hispanic | 69.7 (2.2)       | 77.5 (4.2)              | 83.7 (2.4) <sup>*</sup>   | -3.8 (2.5)                           | -5.5 (4.3)               | -3.5 (2.6)                |
| Treatment                                      |          |                  |                         |                           |                                      |                          |                           |
| 25–44                                          | White    | 49.0 (4.2)       | 52.4 (3.4)              | 60.0 (3.5) <sup>*</sup>   |                                      |                          |                           |
|                                                | Black    | 45.9 (4.2)       | 58.7 (4.1) <sup>*</sup> | 57.9 (3.2) <sup>*</sup>   | -3.1 (5.7)                           | 6.3 (4.9)                | -2.0 (4.6)                |
|                                                | Hispanic | 24.0 (5.2)       | 29.0 (4.8)              | 45.0 (4.7) <sup>*,†</sup> | -25.0 (6.1) <sup>‡</sup>             | -23.4 (6.2) <sup>‡</sup> | -15.0 (5.7) <sup>‡</sup>  |
| 45–64                                          | White    | 62.3 (1.9)       | 73.9 (1.7) <sup>*</sup> | 75.3 (2.2) <sup>*</sup>   |                                      |                          |                           |
|                                                | Black    | 70.4 (2.1)       | 74.4 (1.9)              | 77.8 (1.9) <sup>*</sup>   | 8.0 (2.6) <sup>‡</sup>               | 0.5 (2.6) <sup>§</sup>   | 2.5 (3.0)                 |
|                                                | Hispanic | 56.6 (4.9)       | 67.4 (2.5)              | 70.9 (3.0) <sup>*</sup>   | -5.7 (5.0)                           | -6.5 (2.7) <sup>‡</sup>  | -4.4 (3.8)                |
| ≥65                                            | White    | 66.5 (1.6)       | 79.5 (1.1) <sup>*</sup> | 82.4 (1.4) <sup>*</sup>   |                                      |                          |                           |
|                                                | Black    | 75.9 (2.0)       | 86.8 (2.0) <sup>*</sup> | 85.3 (1.2) <sup>*</sup>   | 9.4 (2.2) <sup>‡</sup>               | 7.4 (2.4) <sup>‡</sup>   | 2.9 (1.7) <sup>§</sup>    |
|                                                | Hispanic | 62.5 (1.7)       | 71.3 (4.5)              | 79.3 (2.4) <sup>*</sup>   | -4.0 (2.1)                           | -8.1 (4.6)               | -3.2 (2.9)                |

| Control               |          |            |             |               |              |                |              |  |
|-----------------------|----------|------------|-------------|---------------|--------------|----------------|--------------|--|
| 25–44                 | White    | 38.9 (4.0) | 42.1 (3.5)  | 50.4 (3.5)*   |              |                |              |  |
|                       | Black    | 24.9 (2.8) | 35.6 (3.6)* | 38.1 (3.4)*   | -14.0 (4.7)‡ | -6.5 (4.6)     | -12.3 (4.6)‡ |  |
|                       | Hispanic | 15.6 (3.7) | 16.8 (3.9)  | 35.1 (4.3)*,† | -23.3 (5.1)‡ | -25.3 (5.6)‡   | -15.2 (4.9)‡ |  |
| 45–64                 | White    | 41.6 (2.0) | 54.6 (1.8)* | 58.4 (2.8)*   |              |                |              |  |
|                       | Black    | 38.0 (2.0) | 45.8 (2.1)* | 50.9 (2.2)*   | -3.6 (2.7)‡  | -8.8 (2.6)‡    | -7.6 (3.7)‡  |  |
|                       | Hispanic | 30.8 (4.3) | 46.1 (2.1)* | 50.0 (3.9)*   | -10.7 (4.3)‡ | -8.5 (2.7)‡    | -8.5 (5.0)   |  |
| ≥65                   | White    | 32.2 (1.4) | 50.0 (1.3)* | 51.3 (2.0)*   |              |                |              |  |
|                       | Black    | 31.9 (2.2) | 49.9 (2.7)* | 45.9 (1.9)*   | -0.3 (2.7)   | -0.1 (3.1)     | -5.3 (2.4)‡  |  |
|                       | Hispanic | 25.5 (2.3) | 34.8 (3.2)* | 46.0 (3.6)*,† | -6.7 (2.6)‡  | -15.2 (3.4)‡,§ | -5.2 (4.2)   |  |
| Control among treated |          |            |             |               |              |                |              |  |
| 25–44                 | White    | 79.3 (4.3) | 80.3 (3.5)  | 84.0 (3.0)    |              |                |              |  |
|                       | Black    | 54.3 (4.9) | 60.6 (5.5)  | 65.8 (4.2)    | -25.0 (6.3)‡ | -19.7 (7.0)‡   | -18.2 (5.2)‡ |  |
|                       | Hispanic | 65.1 (7.9) | 57.9 (10.0) | 78.2 (5.9)    | -14.2 (9.2)‡ | -22.4 (11.0)‡  | -5.8 (6.5)   |  |
| 45–64                 | White    | 66.7 (2.0) | 73.9 (1.4)* | 77.7 (2.1)*   |              |                |              |  |
|                       | Black    | 54.0 (2.4) | 61.5 (2.3)* | 65.4 (1.8)*   | -12.7 (3.1)‡ | -12.4 (2.6)‡   | -12.3 (2.7)‡ |  |
|                       | Hispanic | 54.4 (4.4) | 68.4 (2.6)* | 70.6 (3.5)*   | -12.3 (4.5)‡ | -5.5 (2.8)     | -7.1 (4.1)   |  |
| ≥65                   | White    | 48.4 (1.7) | 62.9 (1.2)* | 62.2 (1.9)*   |              |                |              |  |
|                       | Black    | 42.0 (2.6) | 57.4 (3.1)* | 53.8 (2.2)*   | -6.4 (3.1)‡  | -5.4 (3.3)     | -8.3 (2.5)‡  |  |
|                       | Hispanic | 40.8 (3.6) | 48.7 (3.2)* | 58.0 (3.6)*   | -7.6 (4.1)   | -14.2 (3.6)‡   | -4.1 (4.1)   |  |

\*Statistically significant difference ( $P < 0.05$ ) as compared with 1999–2004 within category of age and race/ethnicity.

†Statistically significant difference ( $P < 0.05$ ) as compared with 2005–2010 within category of age and race/ethnicity.

‡Statistically significant difference ( $P < 0.05$ ) within survey cycle for blacks or Hispanics as compared with whites.

§Statistically significant change in difference ( $P < 0.05$ ) as compared with 1999–2004 (i.e., interaction).

¶Statistically significant change in difference ( $P < 0.05$ ) as compared with 2005–2010 (i.e., interaction).

**Web Table 5.** Trends in hypertension control by age group before and after adjustment for demographic and clinical characteristics—US adults aged ≥25, National Health and Nutrition Examination Survey, 1999–2016

| Age Group (years) and Time Period | Unadjusted          |                           | Adjusted for Sex, Race/Ethnicity, and Age |                           | Additionally Adjusted for BMI and Diabetes |                           | Additionally Adjusted for Insurance Coverage and Usual Source of Care |                           | Additionally Adjusted for Hypertension Awareness |                           |
|-----------------------------------|---------------------|---------------------------|-------------------------------------------|---------------------------|--------------------------------------------|---------------------------|-----------------------------------------------------------------------|---------------------------|--------------------------------------------------|---------------------------|
|                                   | Prevalence (95% CI) | Prevalence Ratio (95% CI) | Prevalence (95% CI)                       | Prevalence Ratio (95% CI) | Prevalence (95% CI)                        | Prevalence Ratio (95% CI) | Prevalence (95% CI)                                                   | Prevalence Ratio (95% CI) | Prevalence (95% CI)                              | Prevalence Ratio (95% CI) |
| <b>25–44</b>                      |                     |                           |                                           |                           |                                            |                           |                                                                       |                           |                                                  |                           |
| 1999–2004                         | 33.5<br>(27.7-39.4) | Referent                  | 33.7<br>(28.3-39.1)                       | Referent                  | 34.0<br>(28.5-39.5)                        | Referent                  | 33.9<br>(28.3-39.5)                                                   | Referent                  | 52.8<br>(45.9-59.7)                              | Referent                  |
| 2005–2010                         | 38.6<br>(33.5-43.7) | 1.15<br>(0.90-1.40)       | 38.8<br>(33.4-43.9)                       | 1.15<br>(0.92-1.38)       | 38.5<br>(33.5-43.6)                        | 1.13<br>(0.90-1.36)       | 38.3<br>(33.4-43.3)                                                   | 1.13<br>(0.90-1.36)       | 56.1<br>(50.4-61.8)                              | 1.06<br>(0.89-1.24)       |
| 2011–2016                         | 44.6<br>(40.0-49.2) | 1.33<br>(1.06-1.60)       | 44.1<br>(39.5-48.7)                       | 1.31<br>(1.07-1.55)       | 43.2<br>(38.7-47.8)                        | 1.27<br>(1.03-1.51)       | 43.8<br>(39.1-48.6)                                                   | 1.29<br>(1.04-1.54)       | 60.8<br>(56.1-65.6)                              | 1.15<br>(0.98-1.33)       |
| <i>2011–2016 vs. 2005–2010</i>    |                     | 1.15<br>(0.96-1.35)       |                                           | 1.13<br>(0.95-1.32)       |                                            | 1.12<br>(0.94-1.31)       |                                                                       | 1.14<br>(0.95-1.33)       |                                                  | 1.08<br>(0.95-1.22)       |
| <b>45–64</b>                      |                     |                           |                                           |                           |                                            |                           |                                                                       |                           |                                                  |                           |
| 1999–2004                         | 39.3<br>(36.1-42.6) | Referent                  | 39.2<br>(36.0-42.4)                       | Referent                  | 40.3<br>(37.1-43.4)                        | Referent                  | 40.1<br>(37.0-43.2)                                                   | Referent                  | 53.2<br>(50.5-55.9)                              | Referent                  |
| 2005–2010                         | 51.7<br>(48.9-54.5) | 1.32<br>(1.18-1.44)       | 51.7<br>(49.0-54.3)                       | 1.32<br>(1.19-1.44)       | 51.7<br>(49.0-54.4)                        | 1.28<br>(1.17-1.40)       | 52.1<br>(49.5-54.8)                                                   | 1.30<br>(1.18-1.42)       | 63.3<br>(60.3-66.3)                              | 1.19<br>(1.11-1.27)       |
| 2011–2016                         | 55.7<br>(51.9-59.4) | 1.42<br>(1.27-1.57)       | 55.9<br>(52.1-59.7)                       | 1.43<br>(1.27-1.58)       | 55.2<br>(51.2-59.1)                        | 1.37<br>(1.23-1.51)       | 55.1<br>(51.2-58.9)                                                   | 1.37<br>(1.23-1.52)       | 67.1<br>(63.6-70.6)                              | 1.26<br>(1.17-1.35)       |
| <i>2011–2016 vs. 2005–2010</i>    |                     | 1.08<br>(0.98-1.17)       |                                           | 1.08<br>(0.99-1.17)       |                                            | 1.07<br>(0.97-1.16)       |                                                                       | 1.06<br>(0.97-1.15)       |                                                  | 1.06<br>(0.99-1.13)       |
| <b>≥65</b>                        |                     |                           |                                           |                           |                                            |                           |                                                                       |                           |                                                  |                           |
| 1999–2004                         | 31.7<br>(29.2-34.2) | Referent                  | 32.2<br>(29.8-34.6)                       | Referent                  | 32.4<br>(29.8-34.9)                        | Referent                  | 32.6<br>(30.0-35.1)                                                   | Referent                  | 43.3<br>(40.6-46.0)                              | Referent                  |
| 2005–2010                         | 49.3<br>(47.1-51.5) | 1.56<br>(1.41-1.70)       | 49.3<br>(47.1-51.5)                       | 1.53<br>(1.40-1.66)       | 49.2<br>(46.8-51.5)                        | 1.52<br>(1.38-1.65)       | 49.1<br>(46.8-51.5)                                                   | 1.51<br>(1.37-1.64)       | 59.0<br>(56.8-61.3)                              | 1.37<br>(1.27-1.46)       |
| 2011–2016                         | 49.9<br>(46.7-53.1) | 1.57<br>(1.41-1.73)       | 49.5<br>(46.2-52.7)                       | 1.54<br>(1.38-1.69)       | 49.1<br>(45.8-52.3)                        | 1.52<br>(1.36-1.67)       | 49.2<br>(45.9-52.5)                                                   | 1.51<br>(1.35-1.66)       | 57.2<br>(53.9-60.5)                              | 1.32<br>(1.21-1.43)       |
| <i>2011–2016 vs. 2005–2010</i>    |                     | 1.01<br>(0.93-1.09)       |                                           |                           |                                            | 1.00<br>(0.92-1.08)       |                                                                       | 1.00<br>(0.92-1.08)       |                                                  | 0.97<br>(0.90-1.04)       |

BMI, body mass index; CI, confidence Interval.

Diabetes status was based on self-report. Insurance coverage and usual source of care were categorized as yes/no.



**Web Table 6.** Trends in hypertension control by age group before and after adjustment for demographic and clinical characteristics among those aware of their hypertension—US adults aged ≥25, National Health and Nutrition Examination Survey, 2007–2016

| Age Group (years) and Time Period | Unadjusted          |                           | Adjusted for Sex, Race/Ethnicity, and Age |                           | Additionally Adjusted for BMI and Diabetes |                           | Additionally Adjusted for Insurance Coverage and Usual Source of Care |                           | Additionally Adjusted for Hypertension Duration |                           |
|-----------------------------------|---------------------|---------------------------|-------------------------------------------|---------------------------|--------------------------------------------|---------------------------|-----------------------------------------------------------------------|---------------------------|-------------------------------------------------|---------------------------|
|                                   | Prevalence (95% CI) | Prevalence ratio (95% CI) | Prevalence (95% CI)                       | Prevalence ratio (95% CI) | Prevalence (95% CI)                        | Prevalence ratio (95% CI) | Prevalence (95% CI)                                                   | Prevalence ratio (95% CI) | Prevalence (95% CI)                             | Prevalence ratio (95% CI) |
| <b>25–44</b>                      |                     |                           |                                           |                           |                                            |                           |                                                                       |                           |                                                 |                           |
| 2007–2010                         | 42.3<br>(36.0-48.6) | Referent                  | 60.7<br>(54.9-66.3)                       | Referent                  | 60.3<br>(54.9-65.7)                        | Referent                  | 60.1<br>(54.7-65.5)                                                   | Referent                  | 59.0<br>(53.7-64.2)                             | Referent                  |
| 2011–2016                         | 44.6<br>(40.0-49.2) | 1.05<br>(0.86-1.24)       | 60.0<br>(55.4-64.6)                       | 0.99<br>(0.87-1.11)       | 60.3<br>(55.6-65.0)                        | 1.00<br>(0.89-1.12)       | 60.0<br>(55.2-64.8)                                                   | 1.00<br>(0.88-1.11)       | 61.0<br>(56.2-65.9)                             | 1.04<br>(0.92-1.15)       |
| <b>45–64</b>                      |                     |                           |                                           |                           |                                            |                           |                                                                       |                           |                                                 |                           |
| 2007–2010                         | 65.0<br>(61.2-68.7) | Referent                  | 64.7<br>(61.0-68.4)                       | Referent                  | 64.7<br>(60.8-68.6)                        | Referent                  | 64.8<br>(60.9-68.7)                                                   | Referent                  | 65.0<br>(61.0-68.9)                             | Referent                  |
| 2011–2016                         | 66.9<br>(63.5-70.4) | 1.02<br>(0.95-1.11)       | 67.2<br>(63.7-70.6)                       | 1.04<br>(0.96-1.11)       | 67.3<br>(63.7-70.8)                        | 1.04<br>(0.96-1.12)       | 67.2<br>(63.6-70.7)                                                   | 1.04<br>(0.96-1.12)       | 67.1<br>(63.6-70.6)                             | 1.03<br>(0.95-1.11)       |
| <b>≥65</b>                        |                     |                           |                                           |                           |                                            |                           |                                                                       |                           |                                                 |                           |
| 2007–2010                         | 61.4<br>(58.7-64.1) | Referent                  | 61.7<br>(59.0-64.3)                       | Referent                  | 61.9<br>(58.9-64.8)                        | Referent                  | 61.9<br>(59.0-64.7)                                                   | Referent                  | 62.1<br>(59.0-65.2)                             | Referent                  |
| 2011–2016                         | 57.8<br>(54.4-60.8) | 0.94<br>(0.87-1.00)       | 57.4<br>(54.1-60.6)                       | 0.93<br>(0.87-0.99)       | 57.3<br>(54.0-60.6)                        | 0.93<br>(0.86-0.99)       | 57.4<br>(54.1-60.7)                                                   | 0.93<br>(0.86-1.00)       | 57.7<br>(54.3-61.0)                             | 0.93<br>(0.86-1.00)       |

BMI, body mass index; CI, confidence Interval.

Diabetes status was based on self-report. Insurance coverage and usual source of care were categorized as yes/no. Duration of hypertension was calculated as age at examination minus age at which the participant was told they had hypertension.

**Web Table 7.** Hypertension Treatment Goals from Major National Guidelines During 1999–2016

| <b>Dates</b> | <b>Guideline</b>            | <b>Blood Pressure Goals</b>                                                                                                  |
|--------------|-----------------------------|------------------------------------------------------------------------------------------------------------------------------|
| 1999–2003    | JNC6*                       | <140/90 mmHg for all patients—lower if tolerated                                                                             |
| 2003–2014    | JNC7                        | <130/80 mmHg for those with diabetes or chronic kidney disease<br><140/90 for all other patients                             |
| 2014–2016    | JNC8 Panel<br>Member Report | <150/90 mmHg for adults aged $\geq 60$ years without diabetes or<br>chronic kidney disease<br><140/90 for all other patients |

JNC, Joint National Committee on Prevention, Detection, Evaluation, and Treatment of High Blood Pressure.

\* Issued in 1997.
